# Supplementary material
Source: publisher site journal article supplement (https://www.dovepress.com/article/407339)
Supplement: Supplementary file 1 [file get_supplementary_file.php]

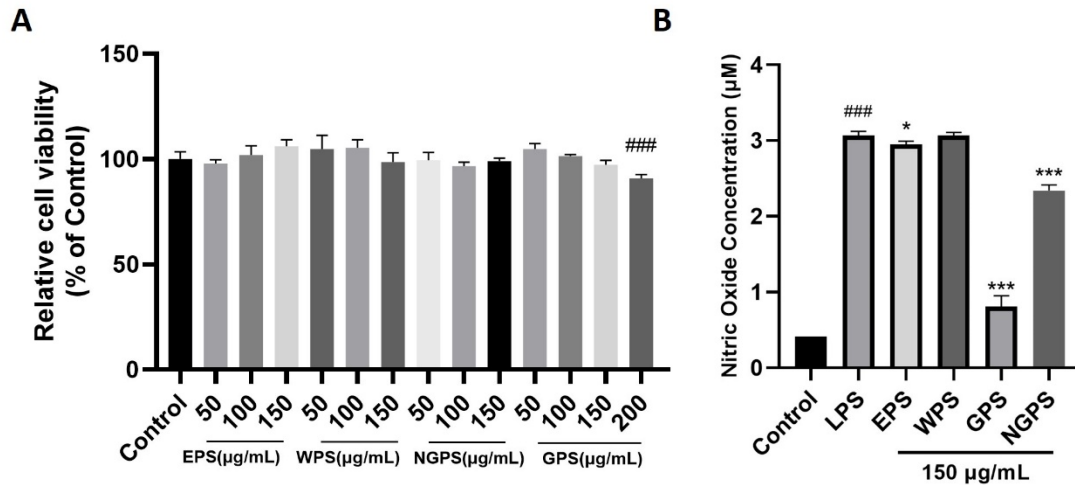

**Figure S1** Anti-inflammatory effects of EPS, WPS, NGPS and GPS on LPS-induced RAW246.7 cells in vitro. **(A)** In vitro cytotoxicity of different concentrations of EPS, WPS, NGPS and GPS in RAW246.7 cells following 24 h of incubation, as revealed by CCK-8 assay. **(B)** NO release in LPS-stimulated RAW246.7 cells. (n = 3) Data represent the mean  $\pm$  SD. ### p < 0.001 vs control group; \*p < 0.05 or \*\*\*P < 0.001 vs LPS-stimulated group.

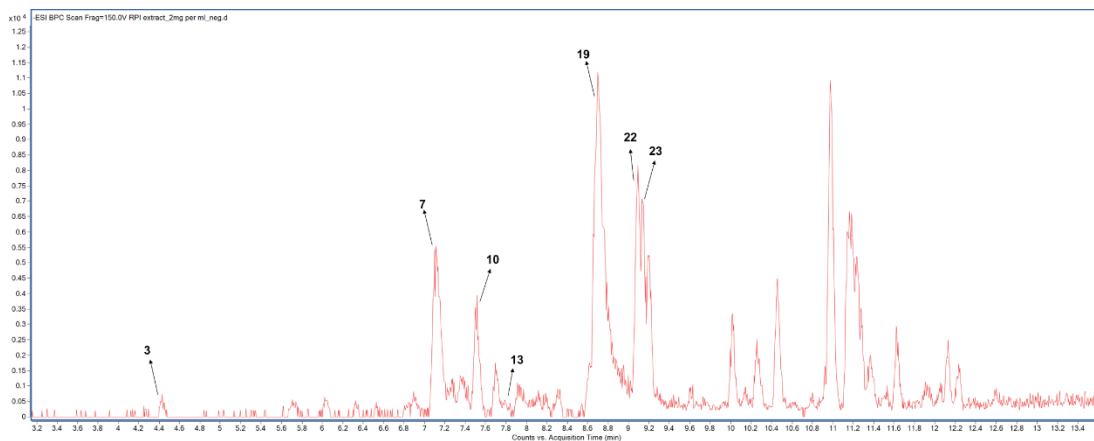

**Figure S2** UPLC-Q-TOF-MS total ion current chromatogram of GPS in the negative ion mode.

**Table S1.** Primer Sequences of Genes

| Gene                           | Sequence (5'-3')       |
|--------------------------------|------------------------|
| $\beta$ -Actin Forward primer  | CTGTCCCTGTATGCCTCTG    |
| $\beta$ -Actin Reversed primer | ATGTCACGCACGATTTCC     |
| IL-6 Forward primer            | GTTCTCTGGGAAATCGTGGA   |
| IL-6 Reversed primer           | TGTACTCCAGGTAGCTA      |
| IL-1 $\beta$ Forward primer    | GAAATGCCACCTTTTGACAGTG |
| IL-1 $\beta$ Reversed primer   | TGGATGCTCTCATCAGGACAG  |
| iNOS Forward primer            | CAGGTCTTTGACGCTCGGAA   |
| iNOS Reversed primer           | GCCTGAAGTCATGTTTGCCG   |

**Table S2.** Information of 30 components of GPS extract determined by UPLC-Q/TOF-MS.

| Peak | tR (min) | Assigned Identity                                   | Molecular formula                               | Identify |
|------|----------|-----------------------------------------------------|-------------------------------------------------|----------|
| 1    | 3.009    | Coniferin                                           | C <sub>16</sub> H <sub>22</sub> O <sub>8</sub>  | Pos, Neg |
| 2    | 4.272    | Cinnamic acid                                       | C <sub>9</sub> H <sub>8</sub> O <sub>2</sub>    | Pos      |
| 3    | 4.420    | Sweroside                                           | C <sub>16</sub> H <sub>22</sub> O <sub>9</sub>  | Pos, Neg |
| 4    | 5.490    | Apocynin                                            | C <sub>9</sub> H <sub>10</sub> O <sub>3</sub>   | Pos      |
| 5    | 5.725    | Scrocaffeside B                                     | C <sub>30</sub> H <sub>34</sub> O <sub>17</sub> | Pos      |
| 6    | 6.905    | Luteoloside                                         | C <sub>21</sub> H <sub>20</sub> O <sub>11</sub> | Pos      |
| 7    | 7.152    | 1,6-dicaffeoyl-β-D-glucopyranoside                  | C <sub>24</sub> H <sub>24</sub> O <sub>12</sub> | Pos, Neg |
| 8    | 7.523    | Verminoside                                         | C <sub>24</sub> H <sub>28</sub> O <sub>13</sub> | Pos      |
| 9    | 7.523    | Picrosecosides                                      | C <sub>32</sub> H <sub>40</sub> O <sub>17</sub> | Pos      |
| 10   | 7.523    | Scroneoside B                                       | C <sub>25</sub> H <sub>28</sub> O <sub>11</sub> | Pos, Neg |
| 11   | 7.715    | Picrosecosides I                                    | C <sub>32</sub> H <sub>40</sub> O <sub>17</sub> | Pos      |
| 12   | 7.715    | Picrogentiosides C                                  | C <sub>32</sub> H <sub>42</sub> O <sub>18</sub> | Pos      |
| 13   | 7.833    | Scroneoside A                                       | C <sub>23</sub> H <sub>26</sub> O <sub>11</sub> | Pos, Neg |
| 14   | 8.122    | 6-Feruloylcatalpol                                  | C <sub>25</sub> H <sub>30</sub> O <sub>13</sub> | Pos      |
| 15   | 8.122    | Aucubin                                             | C <sub>15</sub> H <sub>22</sub> O <sub>9</sub>  | Pos      |
| 16   | 8.180    | 2-(3,4-dihydroxyphenyl)-ethyl-O-β-D-glucopyranoside | C <sub>14</sub> H <sub>20</sub> O <sub>8</sub>  | Pos      |
| 17   | 8.570    | Picroside II                                        | C <sub>23</sub> H <sub>28</sub> O <sub>13</sub> | Pos      |
| 18   | 8.591    | Piceoside                                           | C <sub>14</sub> H <sub>18</sub> O <sub>7</sub>  | Pos      |
| 19   | 8.708    | Luteolin                                            | C <sub>15</sub> H <sub>10</sub> O <sub>6</sub>  | Pos, Neg |
| 20   | 8.799    | Picroside IV                                        | C <sub>24</sub> H <sub>28</sub> O <sub>12</sub> | Pos      |
| 21   | 8.799    | Piscrosides A                                       | C <sub>23</sub> H <sub>30</sub> O <sub>13</sub> | Pos      |
| 22   | 9.024    | Piscrosides B                                       | C <sub>24</sub> H <sub>30</sub> O <sub>12</sub> | Pos, Neg |
| 23   | 9.092    | Picroside I                                         | C <sub>24</sub> H <sub>28</sub> O <sub>11</sub> | Neg      |
| 24   | 9.141    | Caffeic acid                                        | C <sub>9</sub> H <sub>8</sub> O <sub>4</sub>    | Pos      |
| 25   | 9.342    | Scroside D                                          | C <sub>20</sub> H <sub>30</sub> O <sub>13</sub> | Pos      |
| 26   | 9.513    | Picrorosides B                                      | C <sub>32</sub> H <sub>36</sub> O <sub>15</sub> | Pos      |
| 27   | 10.998   | Caffeic acid methyl ester                           | C <sub>10</sub> H <sub>10</sub> O <sub>4</sub>  | Pos      |
| 28   | 11.211   | Vanillic acid                                       | C <sub>8</sub> H <sub>8</sub> O <sub>4</sub>    | Pos      |
| 29   | 11.970   | Scroside B                                          | C <sub>31</sub> H <sub>40</sub> O <sub>16</sub> | Pos      |
| 30   | 13.819   | Palmitic acid                                       | C <sub>16</sub> H <sub>32</sub> O <sub>2</sub>  | Pos      |

**Table S3.** Residues of ERK, JNK, p38 and Akt interacting with luteolin, luteoloside and Picroside II in the optimal conformation

| Protein | Residues | Luteolin                    | Luteoloside                 | Picroside II               |
|---------|----------|-----------------------------|-----------------------------|----------------------------|
| ERK     | Tyr36    | hydrophobic, pi-pi stacking | hydrophobic, pi-pi stacking | hydrophobic                |
|         | Val39    | hydrophobic                 | hydrophobic                 | hydrophobic                |
|         | Lys54    | hydrogen bond               | hydrogen bond, pi-cation    | hydrogen bond              |
|         | Arg67    | hydrophobic                 | —                           | —                          |
|         | Asp106   | hydrogen bond               | —                           | hydrogen bond              |
|         | Lys151   | —                           | —                           | hydrogen bond              |
|         | Ser153   | —                           | —                           | hydrophobic                |
|         | Leu156   | —                           | —                           | hydrophobic                |
| JNK     | Asp167   | hydrophobic                 | hydrophobic                 | hydrogen bond, hydrophobic |
|         | Ile32    | hydrophobic                 | hydrophobic                 | hydrophobic                |
|         | Gly35    | —                           | —                           | hydrophobic                |
|         | Gln37    | —                           | —                           | hydrophobic                |
|         | Val40    | hydrophobic                 | hydrophobic                 | hydrophobic                |
|         | Lys55    | —                           | hydrogen bond               | —                          |
|         | Gln57    | —                           | hydrogen bond               | —                          |
|         | Glu109   | —                           | —                           | hydrogen bond              |
|         | Met111   | hydrogen bond               | hydrogen bond               | hydrogen bond              |
|         | Ala113   | —                           | hydrophobic                 | —                          |
|         | Asp151   | —                           | —                           | hydrogen bond              |
|         | Lys153   | —                           | —                           | hydrogen bond              |
| p38     | Ser155   | —                           | —                           | hydrogen bond, hydrophobic |
|         | Leu168   | hydrophobic, pi-cation      | hydrophobic                 | hydrophobic                |
|         | Ile31    | hydrophobic                 | hydrophobic                 | hydrogen bond, hydrophobic |
|         | Try36    | —                           | hydrophobic                 | —                          |
|         | Val39    | hydrophobic                 | hydrophobic                 | hydrophobic                |
|         | Ala52    | —                           | —                           | hydrogen bond, hydrophobic |
|         | Lys54    | hydrophobic                 | hydrogen bond               | hydrophobic                |
|         | Leu103   | hydrogen bond               | —                           | —                          |
|         | Thr105   | —                           | hydrogen bond               | —                          |
|         | Met108   | —                           | hydrogen bond               | hydrogen bond              |
|         | Lys114   | hydrogen bond               | —                           | hydrogen bond              |
|         | Ser153   | —                           | —                           | hydrophobic                |
|         | Leu156   | hydrophobic                 | hydrophobic                 | hydrophobic                |
|         | Cys166   | —                           | hydrophobic, pi-            | hydrophobic                |

|     |        |               |                               |               |
|-----|--------|---------------|-------------------------------|---------------|
|     |        |               | cation                        |               |
|     | Asp167 | —             | hydrogen bond                 | —             |
| Akt | Gly157 | hydrogen bond | —                             | —             |
|     | Phe161 | —             | hydrophobic                   | hydrophobic   |
|     | Val164 | hydrophobic   | hydrophobic                   | hydrophobic   |
|     | Ala230 | hydrogen bond | —                             | —             |
|     | Glu234 | hydrophobic   | —                             | hydrogen bond |
|     | Asn279 | —             | hydrogen bond                 | —             |
|     | Met281 | hydrophobic   | hydrophobic                   | hydrophobic   |
|     | Thr291 | hydrophobic   | hydrophobic                   | hydrogen bond |
|     | Asp292 | hydrogen bond | hydrogen bond,<br>hydrophobic | hydrophobic   |
